# Supplementary material
Source: publisher figshare collection journal article supplement (https://acs.figshare.com/ndownloader/files/4733617)
Supplement: Supplementary file 1 [file 4733617]

# **Supporting Information**

## **Titanium and Zirconium Complexes for Polymerization of Propylene and Cyclic Esters**

Florina Gornshtein, Moshe Kapon, Mark Botoshansky, and Moris S. Eisen\*

Department of Chemistry and Institute of Catalysis Science and Technology,

Technion – Israel Institute of Technology, Haifa 32000, Israel

## Eyring plots

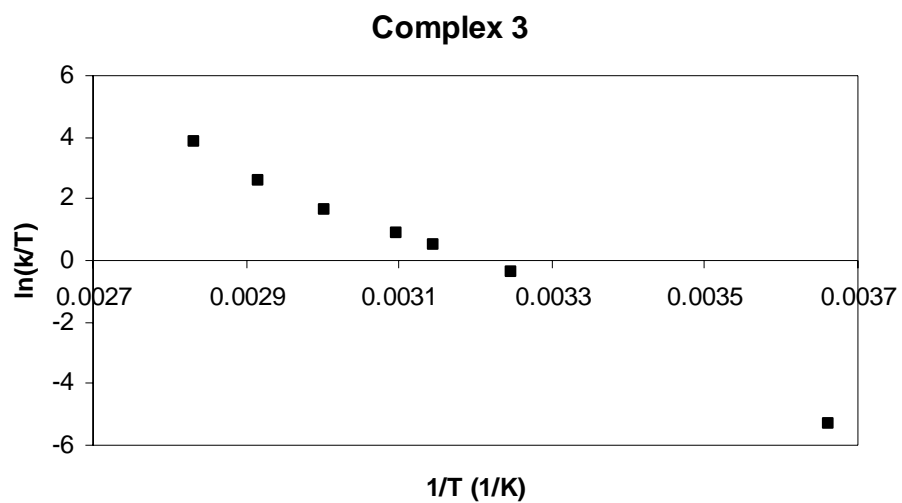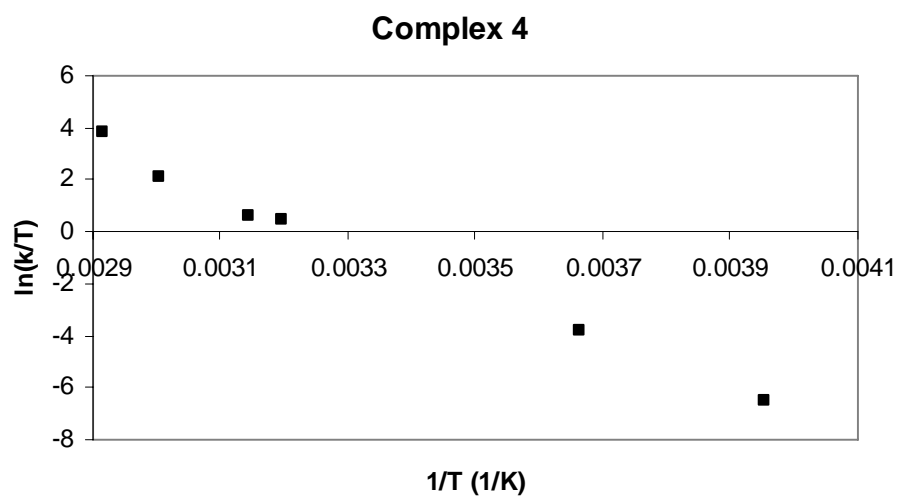

Eyring equation:  $k = (k_B T/h) \cdot e^{-\Delta H^\ddagger/RT} \cdot e^{\Delta S^\ddagger/R}$

k values were calculated using line shape analysis

**Derivation of Equation 5 – Calculative method for finding the number of the moles of living species in a mixture of living and non-living species:**

Definitions:

$M_n$  - number-average molecular weight

$m_{pp}$  - polymer's mass

$n_{pp}$  - moles of polymer chains

$R_i$  - rate of monomer insertion

$R_t$  - rate of termination

$t$  - polymerization time

$n_{cat}$  - moles of catalyst

D.P - degree of polymerization

1.  $M_n = m_{pp}/n_{pp}$

2.  $R_i = n_{propylene}/t$

3.  $R_t = n_{pp}/t$

Living polymerization - time dependencies:

$R_i = \text{constant}$   $m_{pp} \propto t$

$R_t = 0$   $M_n \propto t$

$n_{pp} = n_{cat}$   $D.P \propto t$

Non-living polymerization - time dependencies:

$$R_i = \text{constant}$$

$$m_{pp} \propto t$$

$$R_t = \text{constant} \neq 0$$

$$M_n = \text{constant}$$

$$n_{pp} = m_{pp}/M_n \propto t$$

$$D.P = \text{constant}$$

In a mixture containing both living (l) and non-living (n) species the following relationships can be written:

$$4. \quad n_{pp}(\text{mix}) = n_l + n_n$$

$$5. \quad m_{pp}(\text{mix}) = MW_{\text{monomer}} t(R_{il} + R_{in}) = MW_{\text{monomer}} tR_{itot}$$

$$6. \quad M_n(\text{mix}) = m_{pp}(\text{mix})/n_{pp}(\text{mix})$$

Substitution of Eq. 6 with Eq. 4 and Eq. 5 yields:

$$7. \quad M_n(\text{mix}) = MW_{\text{monomer}} tR_{itot}/(n_l + n_n)$$

Expressing  $n_n$  in terms of  $M_{nn}$  and  $R_{in}$  (Eq. 1 and Eq. 2, respectively) gives:

$$8. \quad M_n(\text{mix}) = MW_{\text{monomer}} tR_{itot}/(n_l + (MW_{\text{monomer}} tR_{in})/M_{nn})$$

If  $t \rightarrow \infty$  then  $n_l$  is negligible and Eq. 8 can be written as:

$$9. \quad R_{in}/M_{nn} = R_{itot}/M_{n(t \rightarrow \infty)}$$

Substitution of the  $R_{in}/M_{nn}$  ratio in Eq. 8 with that found in Eq. 9 gives the expression from which  $n_l$  (moles of living species) can be isolated:

$$10. \quad M_n = MW_{\text{monomer}} tR_{itot}/(n_l + (MW_{\text{monomer}} tR_{itot})/M_{n(t \rightarrow \infty)})$$
